# Supplementary material for: Anti-Tumor Effects of Low Dose Zoledronate on Lung Cancer-Induced Spine Metastasis
Source: PubMed Central journal article supplement (PMC6722631; doi:10.3390/jcm8081212), 2019-08-14
Supplement: jcm-08-01212-s001.pdf [file jcm-08-01212-s001.pdf]

**a**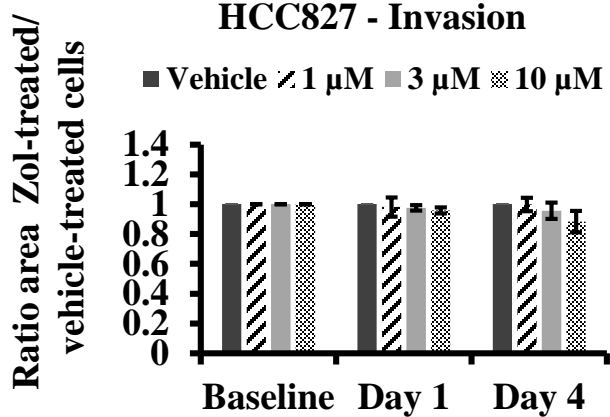**b**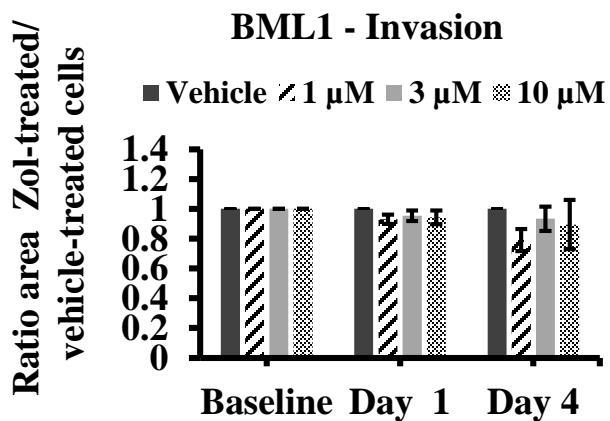**c**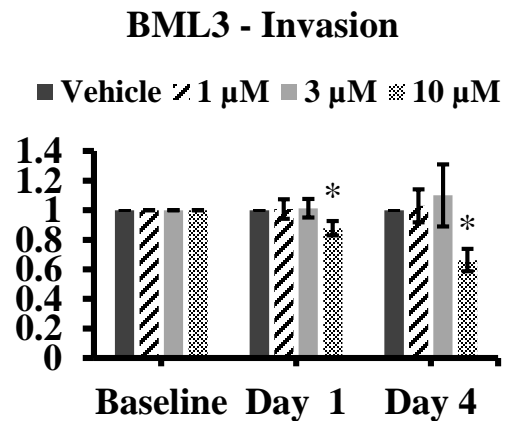**d**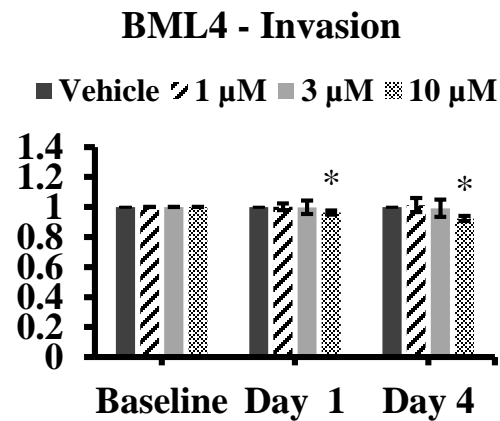**e**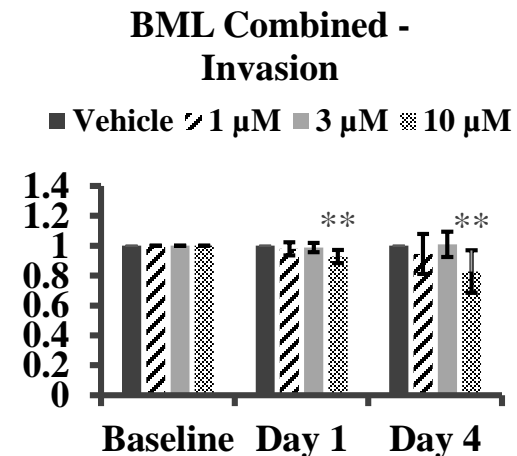

**Figure S1.** Spheroid invasion assay of HCC827 cells and lung-induced bone metastasis cells treated with vehicle (PBS1x) or Zol 1  $\mu$ M, 3 $\mu$ M and 10  $\mu$ M for 1 and 4 days in 1% serum conditions. Histograms for growth in the matrix for HCC827 (a) and lung-induced bone metastasis cells (b, c, d) showing the ratio of drug-treated cells divided by vehicle-treated cells (PBS1x)  $\pm$  SD for three independent experiments. e) combined ratio for the three cell types of lung-induced bone metastasis cells are presented. Each condition (drug-treated cells or vehicle-treated cells) on each day was normalized to day 0 and then to vehicle. Significantly different from control \*p < 0.05, \*\*p < 0.01.
